# Supplementary material for: Sonographic Evaluation of Muscle Echogenicity for the Detection of Intensive Care Unit-Acquired Weakness: A Pilot Single-Center Prospective Cohort Study
Source: MDPI journal article supplement (doi:10.3390/diagnostics12061378), 2022-06-02
Supplement: s1 [file s1]

**Table S2.** P values of mean value comparisons of the parameters of muscle echogenicity displayed in table 2. Statistically significant p values ( $p \leq 0.006$ ) are printed in bold. GS: greyscale value. HS: Heckmatt scale. ICU-AW: intensive care unit - acquired weakness. N/A: value not available. GSSD: greyscale standard deviation. SFT: subcutaneous fat layer thickness.

| p values                                              | Healthy controls<br>vs<br>ICU-AW+<br>day 3 / day 10 | Healthy controls<br>vs<br>ICU-AW-<br>day 3 / day 10 | ICU-AW+ day 3<br>vs<br>ICU-AW- day 3 | ICU-AW+ day 10<br>vs<br>ICU-AW- day 10 |
|-------------------------------------------------------|-----------------------------------------------------|-----------------------------------------------------|--------------------------------------|----------------------------------------|
| <b>Biceps brachii left</b>                            |                                                     |                                                     |                                      |                                        |
| GS                                                    | 0.02 / 0.01                                         | 0.08 / 0.11                                         | 0.54                                 | 0.13                                   |
| z-Score                                               | N/A                                                 | N/A                                                 | 0.54                                 | 0.14                                   |
| HS                                                    | <b>&lt;0.001 / &lt;0.001</b>                        | <b>&lt;0.001 / &lt;0.001</b>                        | 0.06                                 | 0.05                                   |
| GSSD                                                  | 0.70 / 0.39                                         | 0.96 / 0.28                                         | 0.43                                 | 0.76                                   |
| SFT (cm)                                              | 0.06 / 0.05                                         | 0.03 / 0.13                                         | 0.92                                 | 0.15                                   |
| <b>Biceps brachii right</b>                           |                                                     |                                                     |                                      |                                        |
| GS                                                    | 0.01 / 0.03                                         | 0.02 / 0.07                                         | 0.88                                 | 0.22                                   |
| z-Score                                               | N/A                                                 | N/A                                                 | 0.88                                 | 0.66                                   |
| HS                                                    | <b>&lt;0.001 / &lt;0.001</b>                        | <b>&lt;0.001 / &lt;0.001</b>                        | 0.37                                 | 0.16                                   |
| GSSD                                                  | 0.09 / 0.24                                         | 0.13 / 0.73                                         | 0.87                                 | 0.48                                   |
| SFT (cm)                                              | 0.02 / 0.08                                         | 0.03 / 0.11                                         | 0.58                                 | 0.38                                   |
| <b>Brachioradialis left</b>                           |                                                     |                                                     |                                      |                                        |
| GS                                                    | <b>0.003 / 0.02</b>                                 | 0.01 / 0.09                                         | 0.80                                 | 0.46                                   |
| z-Score                                               | N/A                                                 | N/A                                                 | 0.79                                 | 0.47                                   |
| HS                                                    | <b>&lt;0.001 / &lt;0.001</b>                        | <b>&lt;0.001 / &lt;0.001</b>                        | 0.26                                 | 0.04                                   |
| GSSD                                                  | 0.45 / 0.75                                         | 0.79 / 0.89                                         | 0.23                                 | 0.82                                   |
| SFT (cm)                                              | 0.19 / 0.14                                         | 0.15 / 0.66                                         | 0.77                                 | 0.25                                   |
| <b>Brachioradialis right</b>                          |                                                     |                                                     |                                      |                                        |
| GS                                                    | 0.01 / 0.02                                         | 0.02 / 0.06                                         | 0.53                                 | 0.69                                   |
| z-Score                                               | N/A                                                 | N/A                                                 | 0.46                                 | 0.70                                   |
| HS                                                    | <b>&lt;0.001 / &lt;0.001</b>                        | <b>&lt;0.001 / &lt;0.001</b>                        | 0.14                                 | 0.02                                   |
| GSSD                                                  | 0.10 / 0.81                                         | 0.54 / 0.16                                         | 0.09                                 | 0.30                                   |
| SFT (cm)                                              | 0.21 / 0.10                                         | 0.34 / 0.75                                         | 0.70                                 | 0.14                                   |
| <b>Rectus femoris of the Quadriceps femoris left</b>  |                                                     |                                                     |                                      |                                        |
| GS                                                    | 0.09 / 0.08                                         | 0.08 / 0.12                                         | 0.48                                 | 0.46                                   |
| z-Score                                               | N/A                                                 | N/A                                                 | 0.48                                 | 0.48                                   |
| HS                                                    | <b>&lt;0.001 / &lt;0.0001</b>                       | <b>&lt;0.001 / 0.001</b>                            | 0.07                                 | 0.13                                   |
| GSSD                                                  | 0.31 / 0.52                                         | 0.25 / 0.88                                         | 1.0                                  | 0.59                                   |
| SFT (cm)                                              | 0.01 / 0.04                                         | 0.51 / 0.40                                         | 0.08                                 | 0.20                                   |
| <b>Rectus femoris of the Quadriceps femoris right</b> |                                                     |                                                     |                                      |                                        |
| GS                                                    | 0.39 / 0.17                                         | 0.52 / 0.16                                         | 0.81                                 | 0.98                                   |
| z-Score                                               | N/A                                                 | N/A                                                 | 0.81                                 | 0.99                                   |
| HS                                                    | <b>&lt;0.001 / &lt;0.001</b>                        | <b>&lt;0.001 / &lt;0.001</b>                        | 0.49                                 | 0.09                                   |
| GSSD                                                  | 0.01 / 0.20                                         | <b>&lt;0.001 / 0.08</b>                             | 0.40                                 | 0.65                                   |
| SFT (cm)                                              | 0.01 / <b>0.003</b>                                 | 0.14 / 0.33                                         | 0.51                                 | 0.11                                   |
| <b>Tibialis anterior left</b>                         |                                                     |                                                     |                                      |                                        |
| GS                                                    | 0.01 / 0.02                                         | <b>0.002 / 0.006</b>                                | 0.35                                 | 0.70                                   |
| z-Score                                               | N/A                                                 | N/A                                                 | 0.35                                 | 0.70                                   |
| HS                                                    | <b>&lt;0.001 / &lt;0.001</b>                        | <b>&lt;0.001 / &lt;0.001</b>                        | 0.09                                 | 0.21                                   |
| GSSD                                                  | 0.48 / 0.67                                         | 0.98 / 0.11                                         | 0.47                                 | 0.15                                   |
| SFT (cm)                                              | 0.29 / 0.70                                         | 0.90 / 0.88                                         | 0.25                                 | 0.61                                   |
| <b>Tibialis anterior right</b>                        |                                                     |                                                     |                                      |                                        |
| GS                                                    | <b>&lt;0.001 / 0.002</b>                            | 0.01 / <b>0.001</b>                                 | 0.33                                 | 0.60                                   |
| z-Score                                               | N/A                                                 | N/A                                                 | 0.33                                 | 0.60                                   |
| HS                                                    | <b>&lt;0.001 / &lt;0.001</b>                        | <b>&lt;0.001 / &lt;0.001</b>                        | 0.80                                 | <b>0.001</b>                           |
| GSSD                                                  | 0.46 / 0.90                                         | 0.95 / 0.56                                         | 0.58                                 | 0.54                                   |
| SFT (cm)                                              | 0.22 / 0.02                                         | 0.31 / 0.12                                         | 0.59                                 | 0.14                                   |

**Table S3.** Corresponding p values to parameters given in Table 3. Statistically significant p values ( $p \leq 0.006$ ) are printed in bold. The results are rounded to the first decimal place. ICU-AW: intensive care unit - acquired weakness. MGS: global mean greyscale score. MHS: global mean Heckmatt score. MZS: global mean z-score. N/A: data not available.

| p values | Healthy controls<br>vs<br>ICU-AW+<br>day 3 / day 10 | Healthy controls<br>vs<br>ICU-AW-<br>day 3 / day 10 | ICU-AW+ day 3<br>vs<br>ICU-AW- day 3 | ICU-AW+ day 10<br>vs<br>ICU-AW- day 10 |
|----------|-----------------------------------------------------|-----------------------------------------------------|--------------------------------------|----------------------------------------|
| MGS      | <b>0.002</b> / 0.01                                 | 0.02 / 0.04                                         | 0.79                                 | 0.73                                   |
| MZS      | N/A                                                 | N/A                                                 | 0.73                                 | 0.73                                   |
| MHS      | <b>&lt;0.001</b> / <b>&lt;0.001</b>                 | <b>&lt;0.001</b> / <b>&lt;0.001</b>                 | 0.07                                 | <b>0.006</b>                           |

**Table S4.** ROC analysis. Statistically significant p values ( $p < 0.05$ ) are printed in bold. AUC: area under the curve. MGS: global mean greyscale score. MHS: global mean Heckmatt score. MZS: global mean z-score.

| Parameter  | AUC  | Standard error | p value      | 95% confidence interval |
|------------|------|----------------|--------------|-------------------------|
| <b>MGS</b> |      |                |              |                         |
| Day 3      | 0.53 | 0.1            | 0.79         | 0.33 to 0.72            |
| Day 10     | 0.53 | 0.1            | 0.76         | 0.34 to 0.72            |
| <b>MZS</b> |      |                |              |                         |
| Day 3      | 0.54 | 0.1            | 0.72         | 0.34 to 0.73            |
| Day 10     | 0.53 | 0.1            | 0.78         | 0.34 to 0.72            |
| <b>MHS</b> |      |                |              |                         |
| Day 3      | 0.64 | 0.1            | 0.15         | 0.46 to 0.83            |
| Day 10     | 0.79 | 0.08           | <b>0.003</b> | 0.64 to 0.94            |
