# Supplementary material for: Sonographic Evaluation of Muscle Echogenicity for the Detection of Intensive Care Unit-Acquired Weakness: A Pilot Single-Center Prospective Cohort Study
Source: MDPI journal article supplement (doi:10.3390/diagnostics12061378), 2022-06-02
Supplement: s1 [file s1]

Table S1. Ultrasonographic landmarks and probe positions.

| Assessed muscles and positioning of the ultrasound probe using anatomic landmarks                                                                                                | Examples of corresponding ultrasound images                                          |
|----------------------------------------------------------------------------------------------------------------------------------------------------------------------------------|--------------------------------------------------------------------------------------|
| <b>Upper extremity muscles</b>                                                                                                                                                   |                                                                                      |
| <p><b>Musculus biceps brachii</b></p> <p>Half of the way between Tuberculum majus humeri and Fossa olecrani</p>                                                                  |   |
| <p><b>Musculus brachioradialis</b></p> <p>Proximal third part of the way between the anatomical landmarks of the Lateral epicondyle humeri and the Styloid process of radius</p> |  |

| Assessed muscles and positioning of the ultrasound probe using anatomic landmarks                                                                                  | Examples of corresponding ultrasound images                                                                                                            |
|--------------------------------------------------------------------------------------------------------------------------------------------------------------------|--------------------------------------------------------------------------------------------------------------------------------------------------------|
| <b>Lower extremity muscles</b>                                                                                                                                     |                                                                                                                                                        |
| <p><b>Musculus rectus femoris of the quadriceps femoris</b></p> <p>Distal third of the way between anterior superior iliac spine and upper pole of the patella</p> | 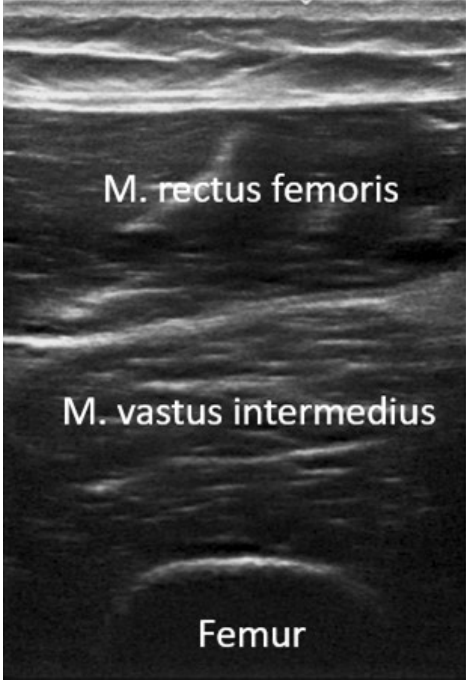 <p>M. rectus femoris</p> <p>M. vastus intermedius</p> <p>Femur</p> |
| <p><b>Musculus tibialis anterior</b></p> <p>Five centimeters distal and one centimeter lateral from the distal pole of the patella</p>                             |  <p>M. tibialis anterior</p> <p>Tibia</p>                          |
